# Supplementary material for: Impact of manganese on the hippocampus metabolism in the context of MEMRI: a proton HRMAS MRS study
Source: Royal Society of Chemistry journal article supplement (doi:10.1039/c4tx00135d), 2014-12-15
Supplement: c4tx00135d1.pdf [file c4tx00135d1.pdf]

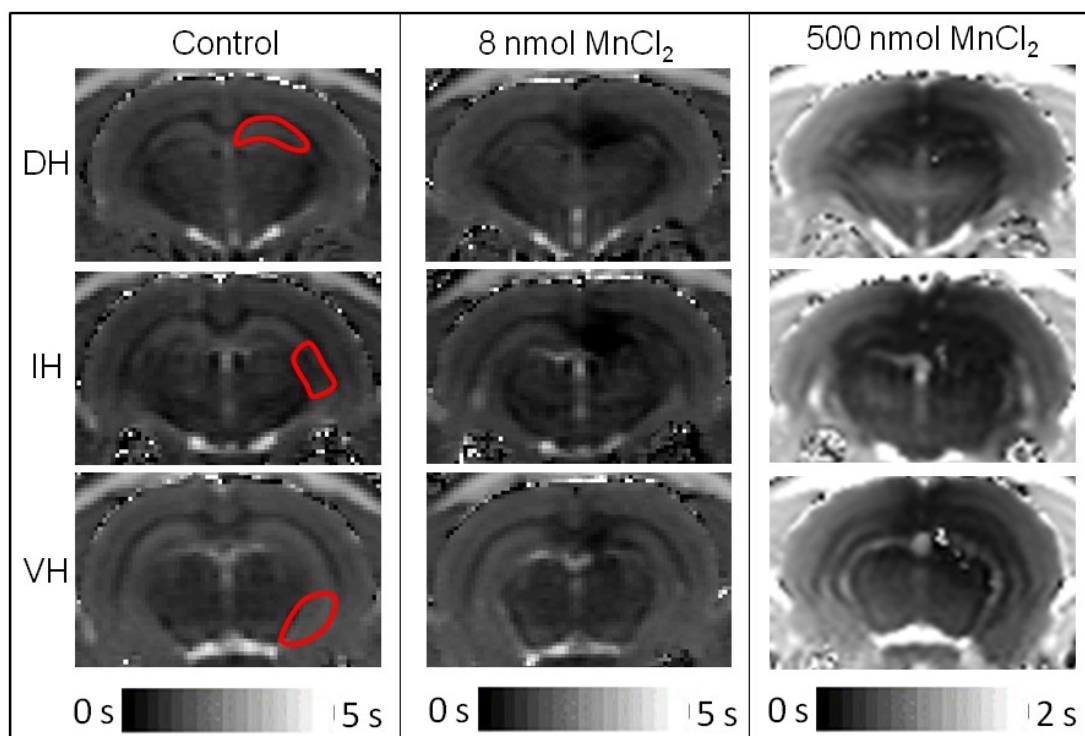

**Fig.1 Supp: T<sub>1</sub> maps after injection of vehicle or two different Mn<sup>2+</sup> doses.**

T<sub>1</sub> map for the 3 hippocampus substructures: dorsal, intermediary and ventral (DH, IH and VH respectively) after Mn<sup>2+</sup> injection (control, low and high doses). The red lines are an example of ipsilateral ROIs that were manually drawn for T<sub>1</sub> quantification in each hippocampus substructure. The same ROIs were drawn for each condition (control, low, and high Mn<sup>2+</sup> doses) and for each hemisphere.
